# Supplementary material for: A mutation in the melon Vacuolar Protein Sorting 41prevents systemic infection of Cucumber mosaic virus
Source: PubMed Central journal article supplement (PMC5585375; doi:10.1038/s41598-017-10783-3), 2017-09-05
Supplement: 41598_2017_10783_MOESM1_ESM.pdf [file 41598_2017_10783_MOESM1_ESM.pdf]

**A mutation in the melon Vacuolar Protein Sorting 41 prevents systemic infection of *Cucumber mosaic virus*.**

Ana Giner<sup>1+</sup>, Laura Pascual<sup>1+!</sup>, Michel Bourgeois<sup>1</sup>, Gabor Gyetvai<sup>1!!</sup>, Pablo Rios<sup>1,!!!</sup>, Belén Picó<sup>2</sup>, Christelle Troadec<sup>3</sup>, Abdel Bendahmane<sup>3</sup>, Jordi Garcia-Mas<sup>1,4</sup>, and Ana Montserrat Martín-Hernández<sup>1,4\*</sup>

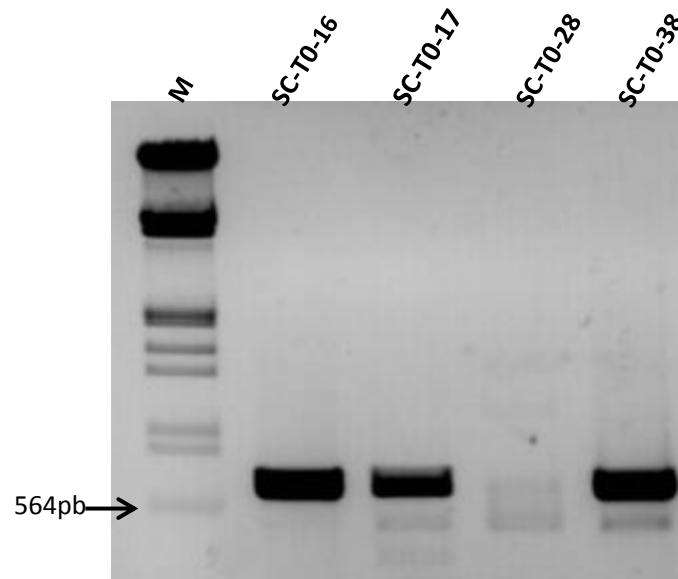

**Supplementary Figure S1. Test for expression of *CmVPS41PS* in T0 transgenic plants.** RT-PCR results of *CmVPS41PS* in SC-T0 transgenic lines. **M** Lambda DNA/EcoRI+HindIII marker, **SC-T0-16**, **SC-T0-17**, **SC-T0-38**, transgenic lines in which *CmVPS41PS* expression was detected, **SC-T0-28** transgenic line where expression was not detected.

## VPS41 expression

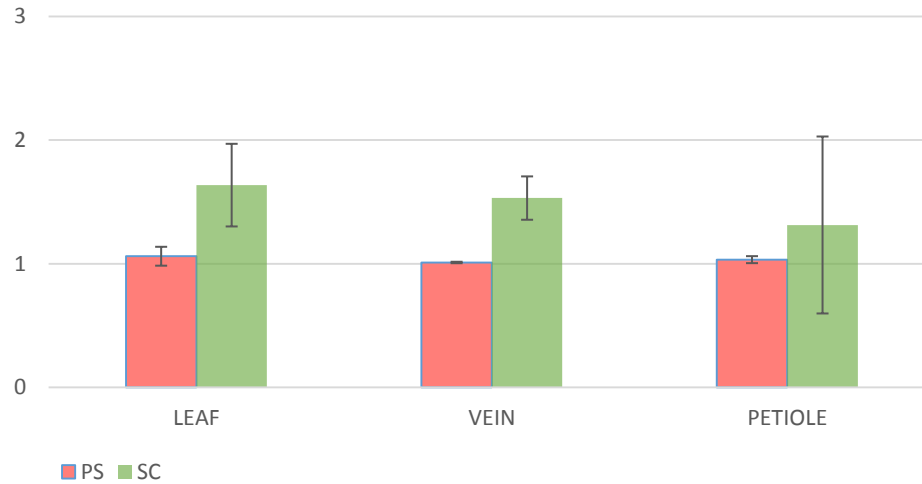

|           | LEAF          |               | VEIN          |               | PETIOLE       |               |
|-----------|---------------|---------------|---------------|---------------|---------------|---------------|
|           | PS            | SC            | PS            | SC            | PS            | SC            |
| Average   | <b>1,0607</b> | <b>1,6356</b> | <b>1,0101</b> | <b>1,5309</b> | <b>1,0331</b> | <b>1,3133</b> |
| Deviation | <b>0,0763</b> | <b>0,3341</b> | <b>0,0060</b> | <b>0,1753</b> | <b>0,0282</b> | <b>0,7153</b> |

**Supplementary Figure S2.** CmVPS41 expression normalized against cyclophilin (CmCYP7) housekeeping gene in leaf, vein and petiole samples. PS susceptible non-inoculated plants, SC resistant plants. Differences of expression between both lines are not statistically significant (fold-change smaller than 2) (in accordance with previous microarray melon data in fruit, where no significant differences were detected (Ref 70)).

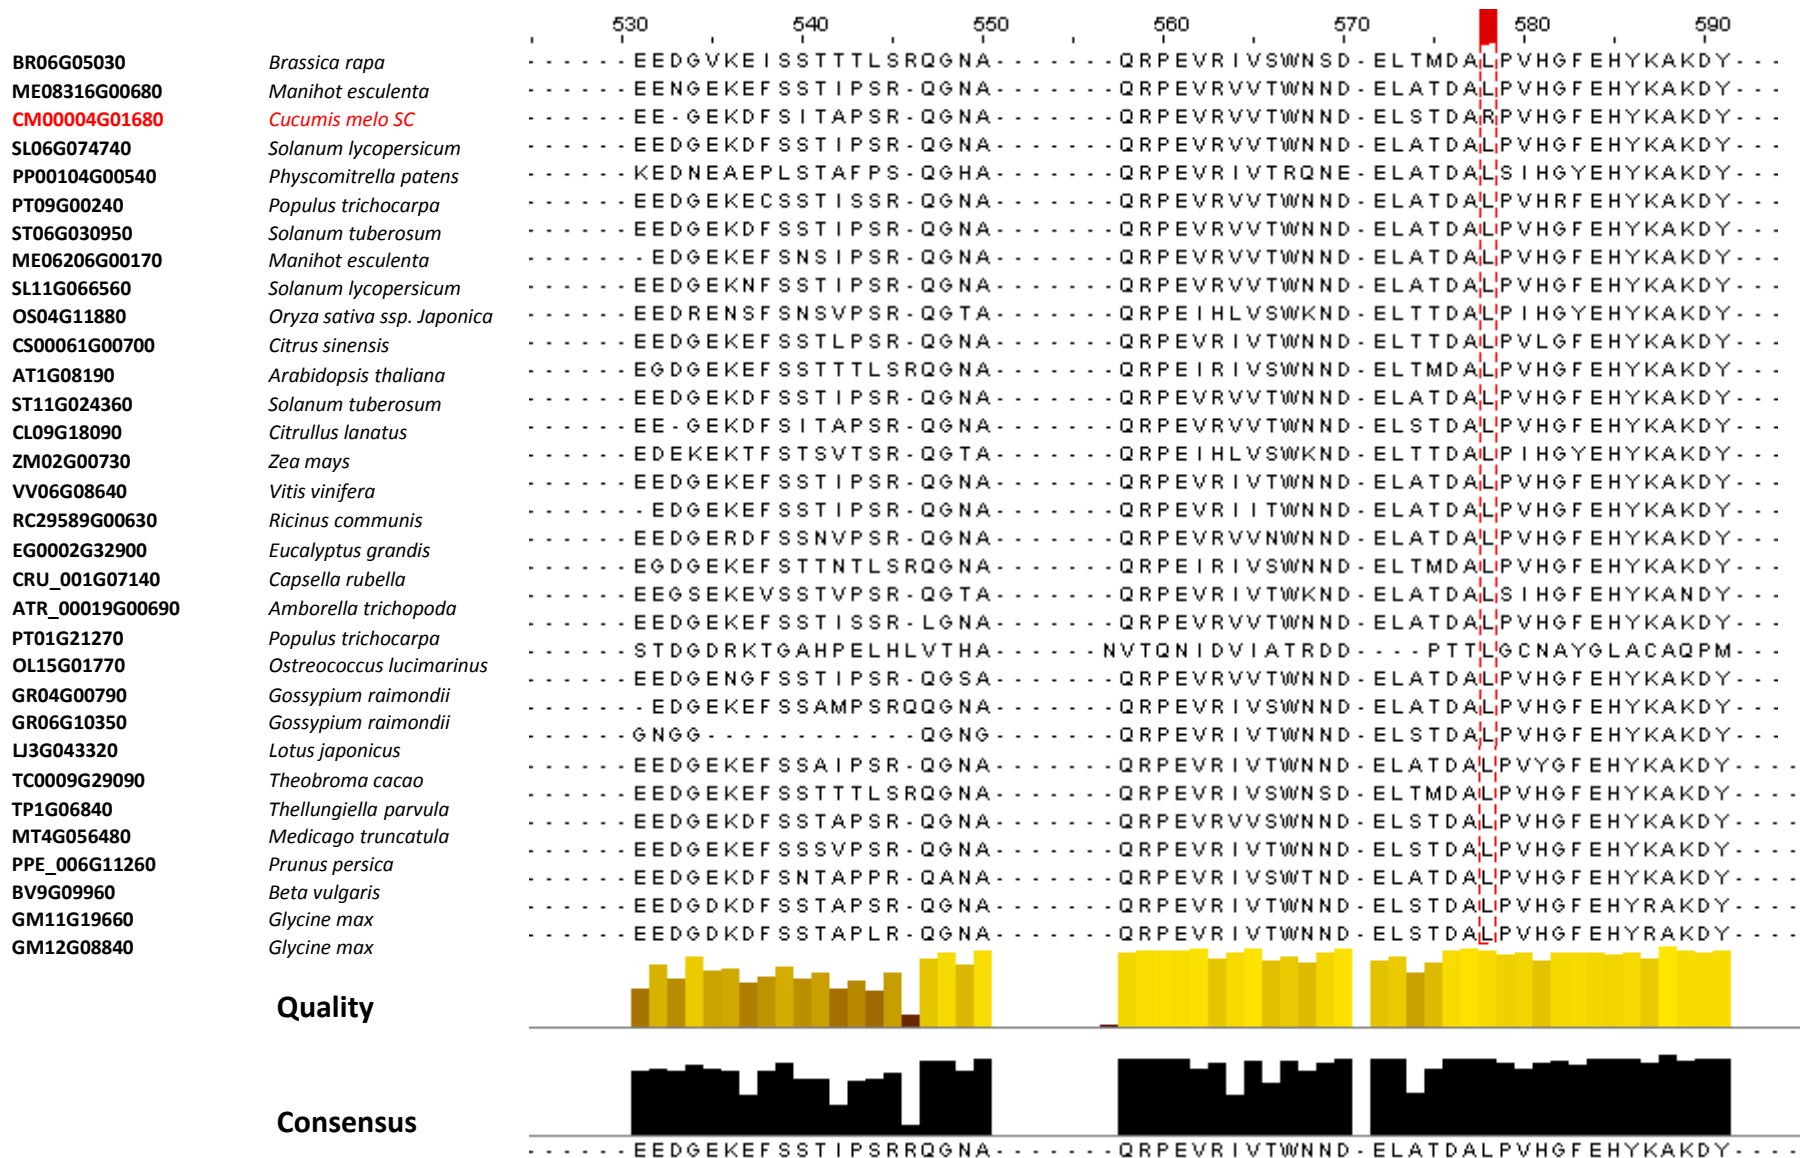

**Supplementary Figure S3.** Alignment of VPS41 orthologues showing the sequence corresponding to the N-terminal part of *C. melo* exon five, including the causal polymorphism. Only species whose exon five sequence is annotated in PLAZA 3.0 are shown (32 out of 36 orthologues). The red square marks the position of the polymorphism associated with the resistance.

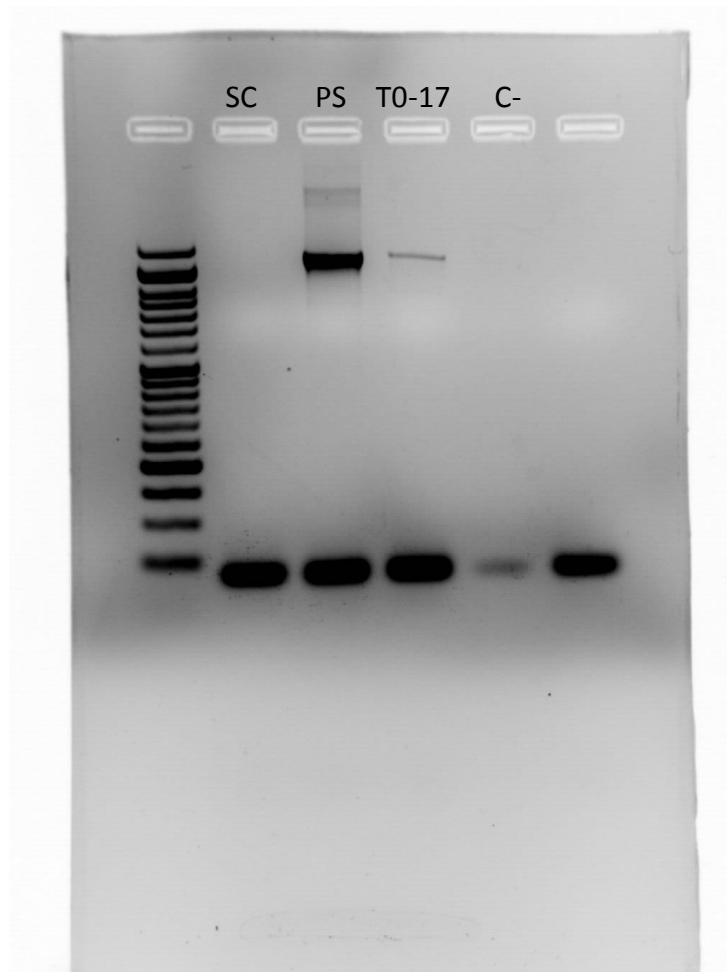

**Supplementary figure S4.** Full length gel with RT-PCR for detection of CMV-LS shown in Figure 3a

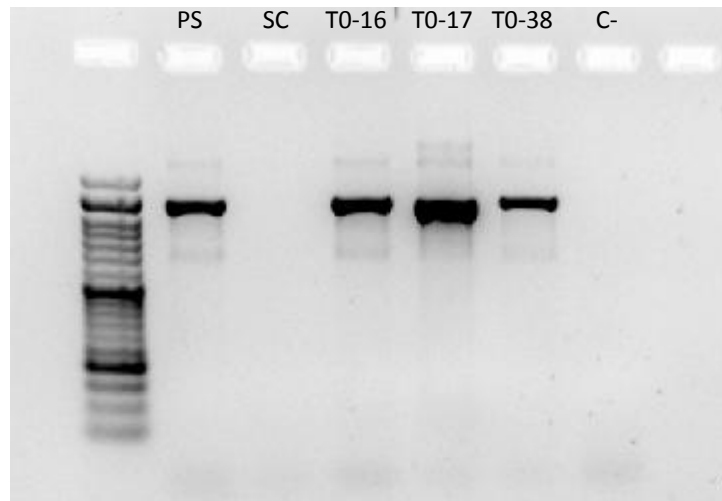

Supplementary figure S5. Full length gel with RT-PCR for detection of CMV-FNY shown in figure 3b.

Table S2. Predicted genes within the smallest *cmv1* interval

| Chr   | Start   | End     | Sense | ID              | Size (bp) | Number of ESTs | Description                                                                                                                    |
|-------|---------|---------|-------|-----------------|-----------|----------------|--------------------------------------------------------------------------------------------------------------------------------|
| chr12 | 9205072 | 9207048 | -     | ID=MELO3C004835 | 1976      | 4              | Similar to Lysosomal Pro-X carboxypeptidase (Homo sapiens) (uniprot_sprot:sp P42785 PCP_HUMAN)                                 |
| chr12 | 9223896 | 9224372 | +     | ID=MELO3C004834 | 476       | 0              | Unknow function                                                                                                                |
| chr12 | 9233256 | 9245726 | -     | ID=MELO3C004833 | 12470     | 1620           | Similar to Crooked neck-like protein 1 (Homo sapiens) (uniprot_sprot:sp Q9BZJ0 CRNL1_HUMAN)                                    |
| chr12 | 9261314 | 9261721 | +     | ID=MELO3C004832 | 407       | 0              | Unknow function                                                                                                                |
| chr12 | 9308238 | 9309629 | +     | ID=MELO3C004831 | 1391      | 209            | Similar to Vacuolar protein sorting-associated protein 41 homolog (Solanum lycopersicum) (uniprot_sprot:sp P93231 VPS41_SOLLC) |
| chr12 | 9310628 | 9311002 | -     | ID=MELO3C004830 | 374       | 0              | Similar to Putative uncharacterized protein (Vitis vinifera) (uniref90:UniRef90_A5BWU8)                                        |
| chr12 | 9311921 | 9312238 | -     | ID=MELO3C004829 | 317       | 0              | Similar to Gag-pol polyprotein, putative (Asparagus officinalis) (uniref90:UniRef90_Q2A9Z5)                                    |
| chr12 | 9313543 | 9313824 | -     | ID=MELO3C004828 | 281       | 0              | Unknow function                                                                                                                |
| chr12 | 9316976 | 9337164 | +     | ID=MELO3C004827 | 20188     | 2266           | Similar to Vacuolar protein sorting-associated protein 41 homolog (Solanum lycopersicum) (uniprot_sprot:sp P93231 VPS41_SOLLC) |

Table S3. *CmVPS41* ORF. Predicted exons for both *CmVPS41* predicted genes in the annotation of *C. melo* version 3.5.1 and manual annotations on the same version 3.5.1.

| Predicted complete gene |         |         | Manually annotated ORF |         |         |
|-------------------------|---------|---------|------------------------|---------|---------|
| Exon                    | Start   | End     | Exon                   | Start   | End     |
| MELO3C004831T1.exon1    | 9308238 | 9308625 | CmVPS41.exon1          | 9308365 | 9308625 |
| MELO3C004831T1.exon2    | 9309056 | 9309325 | CmVPS41.exon2          | 9309056 | 9309325 |
| MELO3C004831T1.exon3    | 9309423 | 9309629 | CmVPS41.exon3          | 9309423 | 9309602 |
| MELO3C004827T1.exon1    | 9316976 | 9316990 | Not present            |         |         |
| MELO3C004827T1.exon2    | 9317278 | 9317541 | CmVPS41.exon4          | 9317278 | 9317541 |
| MELO3C004827T1.exon3    | 9318229 | 9318361 | CmVPS41.exon5          | 9318229 | 9318361 |
| MELO3C004827T1.exon4    | 9318450 | 9318540 | CmVPS41.exon6          | 9318450 | 9318540 |
| MELO3C004827T1.exon5    | 9319045 | 9319147 | CmVPS41.exon7          | 9319045 | 9319147 |
| MELO3C004827T1.exon6    | 9320215 | 9320318 | CmVPS41.exon8          | 9320215 | 9320318 |
| MELO3C004827T1.exon7    | 9320389 | 9320482 | CmVPS41.exon9          | 9320389 | 9320482 |
| MELO3C004827T1.exon8    | 9320579 | 9320734 | CmVPS41.exon10         | 9320579 | 9320734 |
| MELO3C004827T1.exon9    | 9320814 | 9320876 | CmVPS41.exon11         | 9320814 | 9320876 |
| MELO3C004827T1.exon10   | 9320978 | 9321043 | CmVPS41.exon12         | 9320978 | 9321043 |
| MELO3C004827T1.exon11   | 9327401 | 9327601 | CmVPS41.exon13         | 9327401 | 9327601 |
| MELO3C004827T1.exon12   | 9334583 | 9334660 | CmVPS41.exon14         | 9334583 | 9334660 |
| MELO3C004827T1.exon13   | 9334732 | 9334851 | CmVPS41.exon15         | 9334732 | 9334851 |
| MELO3C004827T1.exon14   | 9334983 | 9335063 | CmVPS41.exon16         | 9334983 | 9335063 |
| MELO3C004827T1.exon15   | 9335143 | 9335228 | CmVPS41.exon17         | 9335143 | 9335228 |
| MELO3C004827T1.exon16   | 9336178 | 9336259 | CmVPS41.exon18         | 9336178 | 9336259 |
| MELO3C004827T1.exon17   | 9336345 | 9337164 | CmVPS41.exon19         | 9336345 | 9336794 |



Table S4. TILLING mutants detected in a genomic fragment including CmVPS41 exons 5 and 6.

| Family | Original codon | Mutated codon | AA change | Position | Position from the ORF start | effect PROVEAN | effect PROVEAN |
|--------|----------------|---------------|-----------|----------|-----------------------------|----------------|----------------|
| 411    | <u>GAG</u>     | <u>GAA</u>    | E354E     | EXON     | -                           | -              | -              |
| 451    | -              | -             | -         | INTRON   | -                           | -              | -              |
| 5857   | <u>UCU</u>     | <u>UAU</u>    | S344Y     | EXON     | 1031                        | -4 252         | Deleterious    |
| 6190   | -              | -             | -         | INTRON   | -                           | -              | -              |
| 1326   | <u>GGU</u>     | <u>AGU</u>    | G375S     | EXON     | 1110                        | -0.857         | Neutral        |
| 1410   | -              | -             | -         | INTRON   | -                           | -              | -              |
| 1536   | <u>GAA</u>     | <u>AAA</u>    | E332K     | EXON     | 994                         | -3 253         | Deleterious    |
| 1736   | -              | -             | -         | INTRON   | -                           | -              | -              |
| 3425   | <u>GAC</u>     | <u>AAC</u>    | D360N     | EXON     | 1078                        | -4 736         | Deleterious    |
| 3487   | -              | -             | -         | INTRON   | -                           | -              | -              |
| 2291   | -              | -             | -         | INTRON   | -                           | -              | -              |
| 3932   | -              | -             | -         | INTRON   | -                           | -              | -              |
| 4895   | <u>AGA</u>     | <u>AAA</u>    | R330K     | EXON     | 989                         | -2 393         | Neutral        |
| 6331   | -              | -             | -         | INTRON   | -                           | -              | -              |

Table S5. Predicted effects of the *CmVPS41* changes between PS/SC using PROVEAN and MutPred software

| Genome position                      |                           | 9317350 | 9318296                                                                                   | 9327473                                        |
|--------------------------------------|---------------------------|---------|-------------------------------------------------------------------------------------------|------------------------------------------------|
| Position from ORF start              |                           | 784     | 1043                                                                                      | 1858                                           |
| PS allele                            |                           | C       | T                                                                                         | T                                              |
| SC allele                            |                           | G       | G                                                                                         | C                                              |
| aa Change                            |                           | P262A   | L348R                                                                                     | S620P                                          |
| <b>Provean predictions</b>           |                           |         |                                                                                           |                                                |
| Score                                |                           | -0,903  | -5,929                                                                                    | 1,203                                          |
| Predicted effects                    |                           | Neutral | Deleterious                                                                               | Neutral                                        |
| <b>MutPred predictions</b>           |                           |         |                                                                                           |                                                |
| Probability of deleterious mutation  |                           | 0,33    | 0,801                                                                                     | 0,572                                          |
| <b>MOLECULAR MECHANISM DISRUPTED</b> | Actionable Hypotheses     | Na      | Na                                                                                        | Gain of catalytic residue at P619 (P = 0.0123) |
|                                      | Confident Hypotheses      | Na      | Loss of stability (P = 0.0121)<br>Loss of loop (P = 0.0203) Gain of disorder (P = 0.0401) | Na                                             |
|                                      | Very Confident Hypotheses | Na      | Loss of sheet (P = 0.007)                                                                 | Na                                             |

Table S6. C. melo accessions and genotyping results. Accession name, code (according to previous studies (Refs. 35 and 36) and origin is given for each accession. Accessions are classified according the C. melo subspecies (ssp. melo and ssp. agrestis) and cultivar group (inodorus, cantalupensis, reticulatus, ameri group (including ameri, adana and chandalack), flexuosus (including chate) and dudaim, within ssp. melo, and momordica, conomon (including chinensis, conomon and makuwa), tibish, chito and agrestis, within ssp. agrestis.

| Local/commercial name                                                                                         | Code           | Origin      | CmVPS41      |               |            |
|---------------------------------------------------------------------------------------------------------------|----------------|-------------|--------------|---------------|------------|
|                                                                                                               |                |             | SNP/CAP/Tsel | SNP/CAP/BsiEI | SNP/seq    |
|                                                                                                               |                |             | G/C Exon4    | G/T Exon5     | C/T Exon13 |
| <b><i>C. melo ssp melo</i></b>                                                                                |                |             |              |               |            |
| <i>Inodorus</i> commercial cultivars                                                                          |                |             |              |               |            |
| Piel de sapo Piñonet                                                                                          | In-PsPiñSp     | Spain       | SC           | PS            | SC         |
| Honeydew green flesh                                                                                          | In-HoneyDewUSA | USA         | SC           | PS            | SC         |
| <i>Inodorus</i> Spanish landraces                                                                             |                |             |              |               |            |
| Pipa de Oro                                                                                                   | In-PsPipaSp    | Spain       | SC           | PS            | SC         |
| Piñonocillo                                                                                                   | In-PsPiñonSp   | Spain       | SC           | PS            | SC         |
| Caña Dulce                                                                                                    | In-AmCañSp     | Spain       | SC           | PS            | SC         |
| Amarillo Oro                                                                                                  | In-AmAoroSp    | Spain       | SC           | PS            | SC         |
| Blanco Escrito                                                                                                | In-BBescrSp    | Spain       | SC           | PS            | SC         |
| Mollerusa                                                                                                     | In-TeMollSp    | Spain       | SC           | PS            | SC         |
| Largo de Villaconejos                                                                                         | In-TelVillSp   | Spain       | SC           | PS            | SC         |
| Coca                                                                                                          | In-LaCocaSp    | Spain       | SC           | PS            | SC         |
| Melon de Calamonte                                                                                            | In-LaCalSp     | Spain       | SC           | PS            | SC         |
| Madura Amarilla                                                                                               | In-MAmSp       | Spain       | SC           | PS            | SC         |
| <i>Inodorus</i> landraces from Europe, North Africa and Asia                                                  |                |             |              |               |            |
| Kirkagac                                                                                                      | In-KirkTur     | Turkey      | SC           | PS            | SC         |
| Maazoon                                                                                                       | In-MaazTun     | Tunisia     | SC           | PS            | SC         |
| Baskavas                                                                                                      | In-BaskGreece  | Greece      | SC           | PS            | SC         |
| Hami melon                                                                                                    | In-HamiChi     | China       | SC           | PS            | SC         |
| Asli                                                                                                          | In-AsliTun     | Tunisia     | SC           | PS            | SC         |
| <i>Ameri/adana/chandalack</i> and other landraces from Europe and Asia                                        |                |             |              |               |            |
| Korça                                                                                                         | Am-KorcaRus    | Russia      | SC           | PS            | PS         |
| Kizil Uruk                                                                                                    | Am-Kizil-Uzbe  | Uzbequistan | SC           | PS            | SC         |
| Mucha Nesvi*                                                                                                  | Am-NesviGeor   | Georgia     | SC           | PS            | SC         |
| Chandalack (PI 276660)                                                                                        | Am-ChandAfg    | Afghanistan | SC           | PS            | SC         |
| Ananas Yokneam*                                                                                               | Am-YokIs       | Israel      | SC           | PS            | SC         |
| Zatta                                                                                                         | La-Zat-Ita     | Italy       | SC           | PS            | SC         |
| <i>Cantalupensis</i> and <i>reticulatus</i> commercial cultivars and landraces from Europe, Asia, and America |                |             |              |               |            |
| Cantalup D'Alger*                                                                                             | Can-CAFran     | France      | SC           | PS            | SC         |
| Dulce                                                                                                         | Can-DulUSA     | USA         | SC           | PS            | SC         |
| Nantais Oblong*                                                                                               | Can-NOFran     | France      | PS           | PS            | PS         |
| Noir des carmes                                                                                               | Can-NCFran     | France      | PS           | PS            | PS         |
| PMR-45                                                                                                        | Can-PMRUSA     | France      | SC           | PS            | PS         |
| Prescott fond blanc                                                                                           | Can-PresFran   | France      | PS           | PS            | PS         |
| Vedrantais                                                                                                    | Can-VedFran    | France      | PS           | PS            | PS         |
| WI_998                                                                                                        | Can-WiUSA      | USA         | SC           | PS            | SC         |
| Y285                                                                                                          | Can-Y          | Yugoslavia  | SC           | PS            | Het        |
| Ar Hale's Best Jumbo*                                                                                         | Can-HBJUSA     | USA         | SC           | PS            | SC         |

|                                                                   |              |             |    |    |    |
|-------------------------------------------------------------------|--------------|-------------|----|----|----|
| Earl's Favourite*                                                 | Can-EfJa     | Japan       | SC | PS | SC |
| Old Time Tenesse*                                                 | Can-TeUSA    | USA         | SC | PS | SC |
| Persian Small Type*                                               | Can-PSUSA    | USA         | SC | PS | SC |
| Seminole                                                          | Can-SemUSA   | USA         | SC | PS | SC |
| <i>Flexuosus</i> and <i>chate</i> accessions from Asia and Europe |              |             |    |    |    |
| Snake melon                                                       | Flex-SnakeSA | Saudi Arab. | SC | PS | SC |
| Arya                                                              | Flex-AryaInd | India       | SC | PS | SC |
| Carosello                                                         | Chate-Carlta | Italy       | SC | PS | SC |
| <i>Dudaim</i> accession                                           |              |             |    |    |    |
| Queen's pocket melon*                                             | Dud-QPMAfg   | Afganistan  | SC | PS | SC |
| <b><i>C.melo ssp.agrestis</i></b>                                 |              |             |    |    |    |
| <i>Momordica</i> accessions from India                            |              |             |    |    |    |
| PI 124112                                                         | Mom-PI124Ind | India       | SC | PS | SC |
| MR1                                                               | Mom-MR1Ind   | India       | SC | PS | SC |
| PI 414723                                                         | Mom-PI414Ind | India       | SC | PS | SC |
| <i>Conomon</i> accession from Far East                            |              |             |    |    |    |
| Ginsen makuwa                                                     | Con-GMJJa    | Japan       | SC | SC | SC |
| Freeman's Cucumber                                                | Con-FreeCJa  | Japan       | SC | PS | SC |
| Paul*                                                             | Con-PauPol   | Poland      | SC | PS | SC |
| <i>Tibish, chito</i> and <i>agrestis</i> from Asia and Africa     |              |             |    |    |    |
| Tibish Khurtagat*                                                 | Tibish-KSud  | Sudan       | SC | PS | SC |
| Velleri (PI 164320)                                               | Chi-VellInd  | India       | SC | PS | SC |
| PI 185111                                                         | Ag-15591Gha  | Ghana       | SC | PS | SC |
| Tayer                                                             | Ag-TayCam    | Cameroon    | SC | PS | SC |
| Trigonus                                                          | Ag-TrilInd   | India       | SC | PS | SC |

This collection of accessions is currently maintained at the Institute for the Conservation and Breeding of the Agrobiodiversity (COMAV) genebank ([www.comav.upv.es](http://www.comav.upv.es)). Accessions marked with an asterisk were kindly supplied by M.Pitrat (INRA). PI accessions are from USDA-NPGS gene bank.

**Table S7.** *VPS41* orthologue genes in sequenced plant species according to PLAZA3.0

| <b>Gene_id</b>  | <b>species</b>                    | <b>short name species</b> | <b>chr</b>          |
|-----------------|-----------------------------------|---------------------------|---------------------|
| AT1G08190       | <i>Arabidopsis thaliana</i>       | ath                       | 1                   |
| ATR_00019G00690 | <i>Amborella trichopoda</i>       | atr                       | scaffold00019       |
| BR06G05030      | <i>Brassica rapa</i>              | bra                       | A06                 |
| BV9G09960       | <i>Beta vulgaris</i>              | bvu                       | Bvchr9.sca018       |
| CL09G18090      | <i>Citrullus lanatus</i>          | cla                       | Chr9                |
| CM00004G01680   | <i>Cucumis melo</i>               | cme                       | CM3.5_scaffold00004 |
| CP00047G00240   | <i>Carica papaya</i>              | cpa                       | supercontig_47      |
| CR03G15610      | <i>Chlamydomonas reinhardtii</i>  | cre                       | chromosome_3        |
| CRU_001G07140   | <i>Capsella rubella</i>           | cru                       | scaffold_1          |
| CS00061G00700   | <i>Citrus sinensis</i>            | csi                       | scaffold00061       |
| EG0002G32900    | <i>Eucalyptus grandis</i>         | egr                       | scaffold_2          |
| GM11G19660      | <i>Glycine max</i>                | gma                       | Gm11                |
| GM12G08840      | <i>Glycine max</i>                | gma                       | Gm12                |
| GR04G00790      | <i>Gossypium raimondii</i>        | gra                       | Chr04               |
| GR06G10350      | <i>Gossypium raimondii</i>        | gra                       | Chr06               |
| LJ3G043320      | <i>Lotus japonicus</i>            | lja                       | chr3                |
| MD00G253560     | <i>Malus domestica</i>            | mdo                       | MDC010900.373       |
| MD00G452170     | <i>Malus domestica</i>            | mdo                       | MDC020832.278       |
| ME06206G00170   | <i>Manihot esculenta</i>          | mes                       | scaffold06206       |
| ME08316G00680   | <i>Manihot esculenta</i>          | mes                       | scaffold08316       |
| MT4G056480      | <i>Medicago truncatula</i>        | mtr                       | chr4                |
| OL15G01770      | <i>Ostreococcus lucimarinus</i>   | olu                       | Chr_15              |
| OS04G11880      | <i>Oryza sativa ssp. japonica</i> | osa                       | 4                   |
| PP00104G00540   | <i>Physcomitrella patens</i>      | ppa                       | scaffold_104        |
| PPE_006G11260   | <i>Prunus persica</i>             | ppe                       | scaffold_6          |
| PT01G21270      | <i>Populus trichocarpa</i>        | ptr                       | Chr01               |
| PT09G00240      | <i>Populus trichocarpa</i>        | ptr                       | Chr09               |
| RC29589G00630   | <i>Ricinus communis</i>           | rco                       | 29589               |
| SL06G074740     | <i>Solanum lycopersicum</i>       | sly                       | ch06                |
| SL11G066560     | <i>Solanum lycopersicum</i>       | sly                       | ch11                |
| ST06G030950     | <i>Solanum tuberosum</i>          | stu                       | chr06               |
| ST11G024360     | <i>Solanum tuberosum</i>          | stu                       | chr11               |
| TC0009G29090    | <i>Theobroma cacao</i>            | tca                       | scaffold_9          |
| TP1G06840       | <i>Thellungiella parvula</i>      | tpa                       | ch1-1               |
| VV06G08640      | <i>Vitis vinifera</i>             | vvi                       | chr6                |
| ZM02G00730      | <i>Zea mays</i>                   | zma                       | 2                   |

Table S8. Primers used for sequencing , covering the complete sequence of *cmv1 cDNA* .

| Primer  | Sequence 5'            | Lenght | PCR TM.°C |
|---------|------------------------|--------|-----------|
| pAG 049 | CACATATTCACCTTCTGTATCA | 22     | 56        |
| pAG 042 | TGGCTAGGATACAAAGACCA   | 20     | 56        |
| pAG 022 | GTCAAGATTGCATCAATTAG   | 20     | 52        |
| pAG 023 | CTAATTGATGCAATCTTGAC   | 20     | 52        |
| pAG 024 | TCATACTGCCCATCTACGA    | 19     | 55        |
| pAG 041 | GTGTATAATGTTGACTACTACG | 22     | 56        |
| pAG 025 | ATGTTATTGGAGCACACAGT   | 20     | 54        |
| pAG 011 | TCAAGTCTTGGAAGCAGCAG   | 20     | 56        |
